# Supplementary material
Source: publisher site journal article supplement (https://www.spandidos-publications.com/1755/downloadSupplementary)
Supplement: Supplementary file 1 [file downloadSupplementary]

Figure S1. Linking TAT sequence to Mot-P2 enhanced its cytotoxicity. Ramos cells were treated with 50  $\mu$ M Mot-P2 or Mot-P2-TAT or DMSO for 24 h in growth medium. Cells were washed, stained with propidium iodide and analyzed by flow cytometry. Percentage of cell death was calculated relative to DMSO-treated cells. n=3. \*P<0.05, Mot-P2 vs. Mot-P2-TAT. TAT, transactivator of transcription.

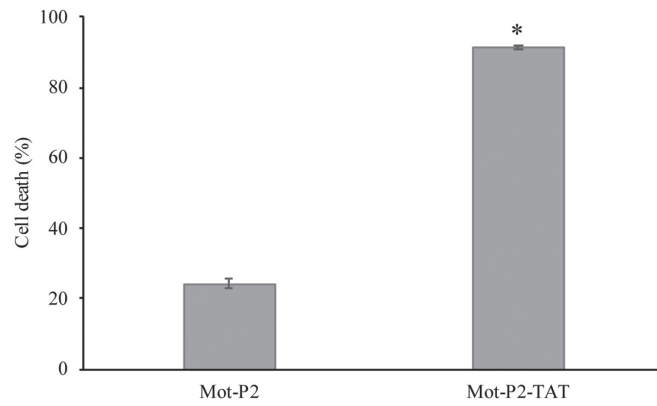

Figure S2. Mot-P2 and Mot-P7 uptake and intracellular distribution in carcinoma cells. PC3, SKOV3 and T47D cells were seeded in 4-well chamber slides and treated with biotinylated Mot-P2 or Mot-P7 (5 or 10  $\mu$ M, respectively) for 5 min at 37°C. Next, cells were washed, fixed and permeabilized. For nuclear staining, 300 nM DAPI staining solution was added for 5 min at room temperature. For peptide staining, cells were treated with 5  $\mu$ g/ml FITC-conjugated streptavidin for 30 min at room temperature. Cell imaging was performed using a Leica-SP5 confocal microscope.

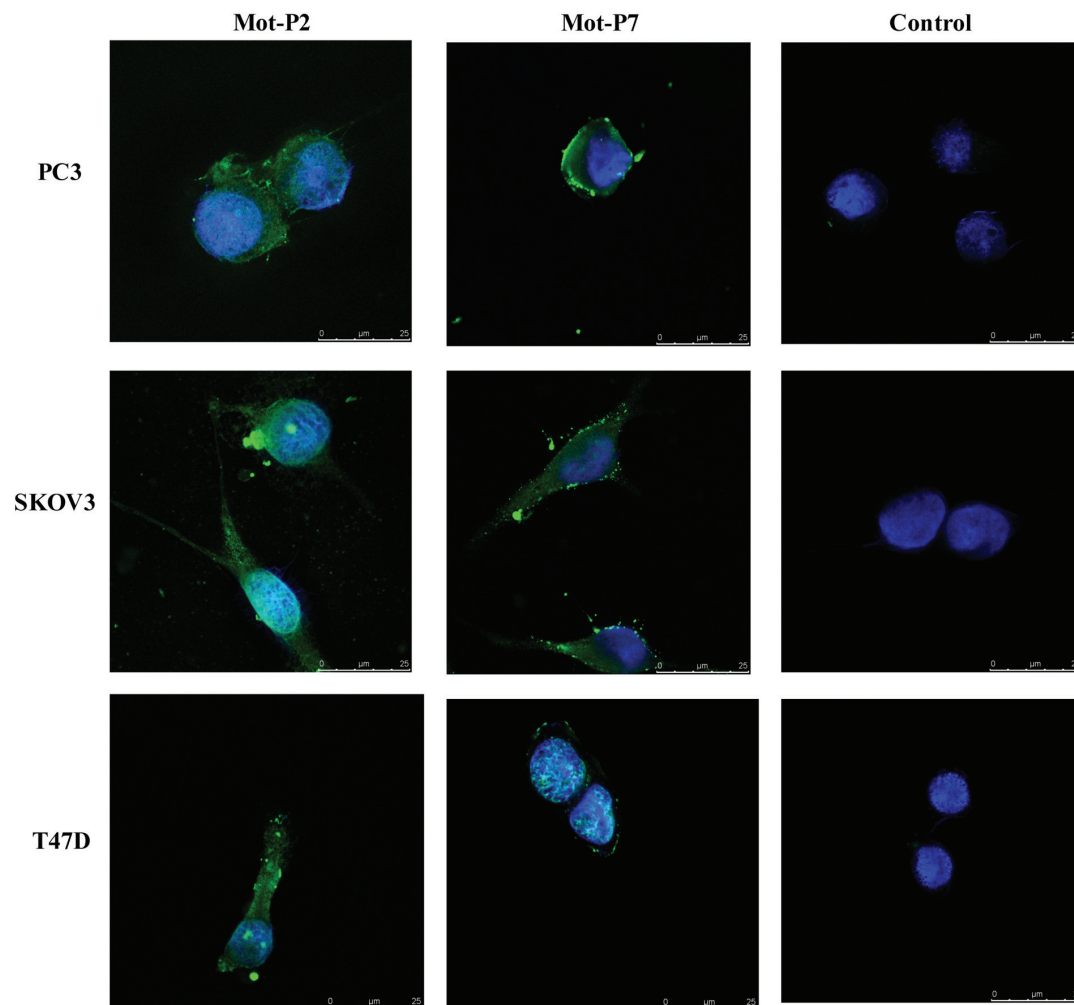

Figure S3. Kinetics of LDH release relative to ATP loss in cells treated with Mot-P2 and Mot-P7. (A and B) Ramos, (C and D) PC3, (E and F) T47D and (G and H) SKOV3 cells were treated with 25  $\mu$ M Mot-P2 (A,C,E,G) or 100  $\mu$ M Mot-P7 (B,D,F,H) for the indicated times at 37°C. Next, cells were analyzed for ATP levels (black lines) and LDH release (grey lines). Data were expressed as RLU  $\pm$  SD (ATP) or RFU  $\pm$  SD (LDH). Maximal LDH release is indicated in each figure by the symbol ■. LDH, lactate dehydrogenase; RFU, relative fluorescence unit; SD, standard deviation; RLU, relative luminescence unit.

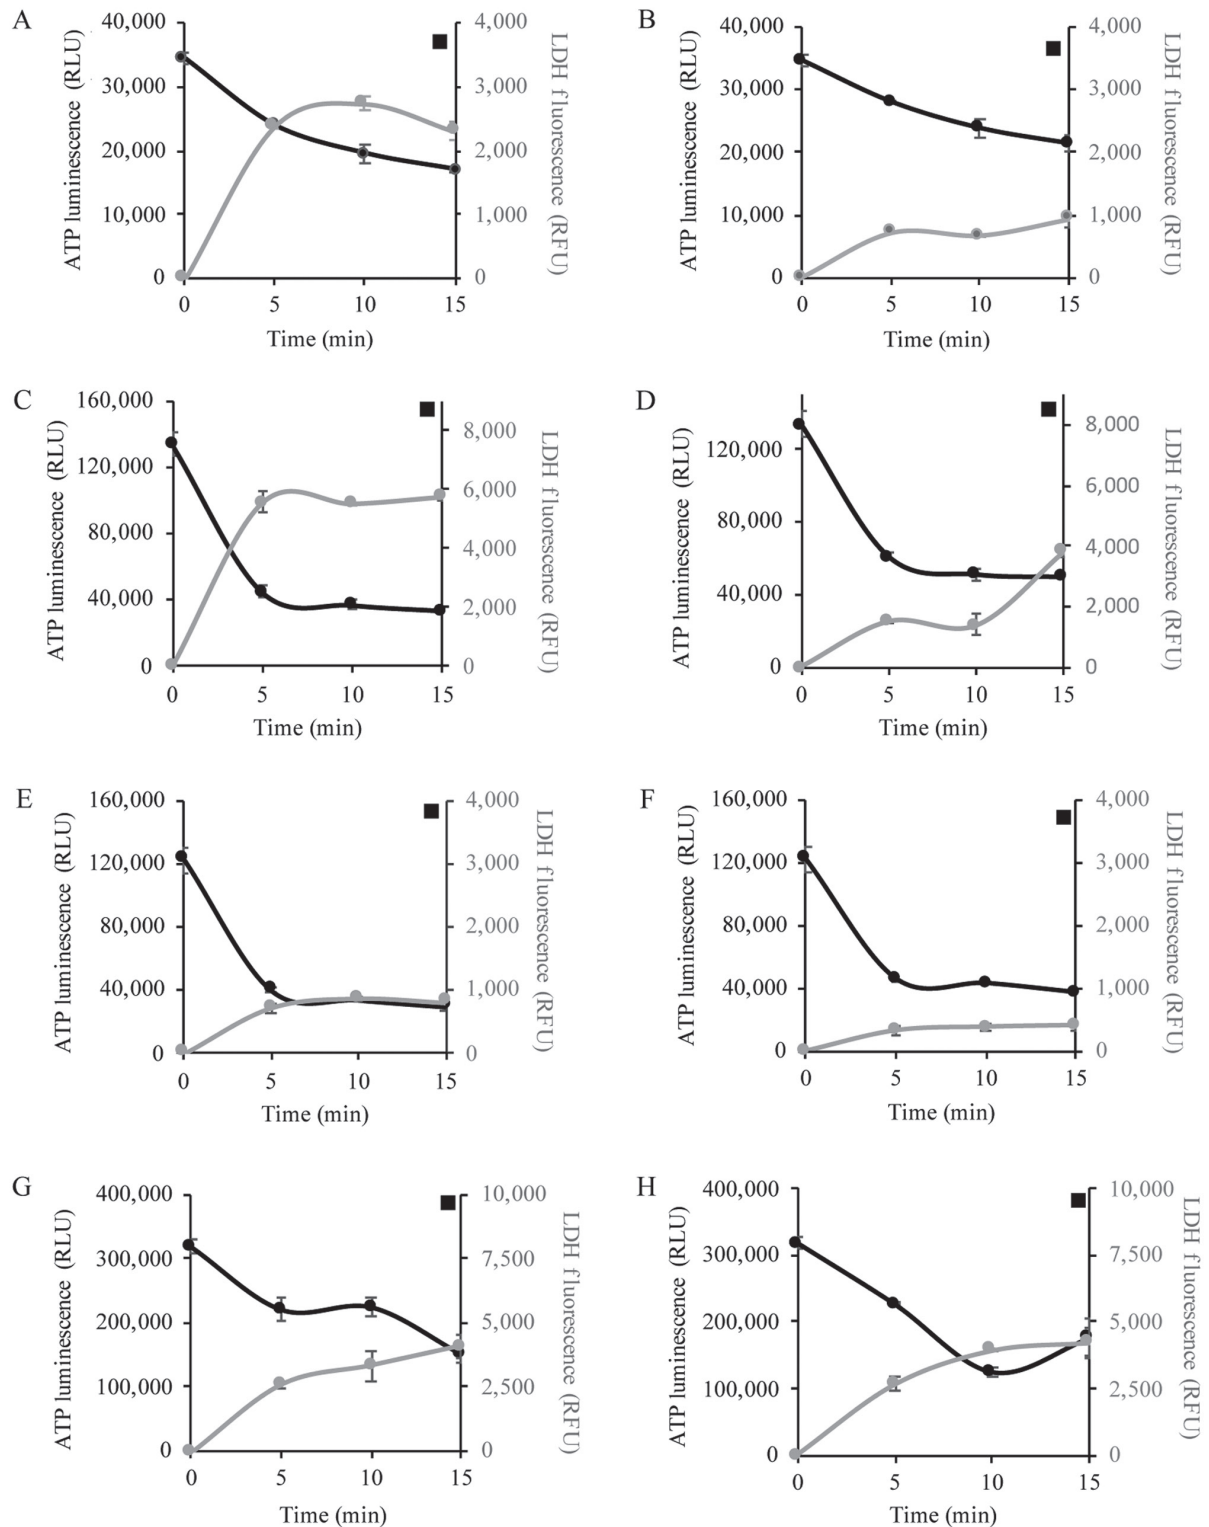

Figure S4. Growth curves of cells treated with Mot-P2 or Mot-P7. Ramos cells were grown with sub-toxic doses of Mot-P2 or Mot-P7 (5 or 25  $\mu$ M, respectively) or DMSO as a control in growth medium. After 48 or 72 h, cells were collected, stained with PI and the number of viable cells (PI-negative) was determined by flow cytometry. Data are expressed as the number of viable cells. n=2.  $P<0.05$ , each peptide vs. DMSO-treated cells.

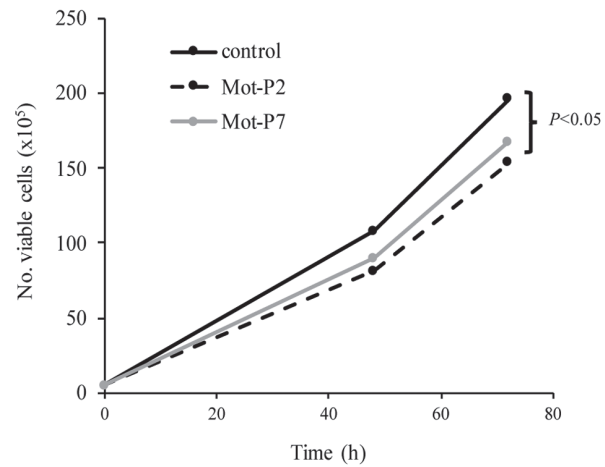

Figure S5. Silencing of mortalin lowered peptide cytotoxicity in T47D and PC3 cells. T47D and PC3 cells were transfected by electroporation with mort siRNA or Sc siRNA as a control for 48 h. Transfected cells were collected by trypsinization, washed and counted. Cells were placed in test tubes and treated with 25  $\mu$ M Mot-P2 or 100  $\mu$ M Mot-P7 for 30 min at 37°C. Then, cells were centrifuged at 250 x g for 6 min at 4°C and supernatant was collected. Extent of LDH release, as a measure of cell death, was quantified and percentage of cell death was calculated. \*P<0.05, \*\*P<0.01 vs. Sc siRNA-transfected cells. Cell transfection was confirmed by western blotting. Mort, mortalin; Sc, scramble; si, small interfering; LDH, lactate dehydrogenase.

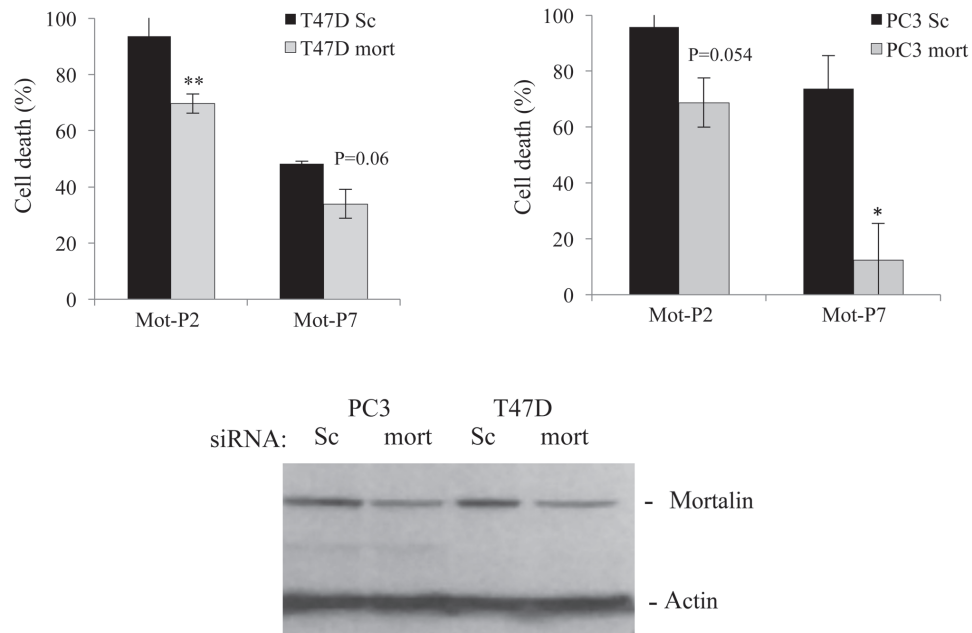

Figure S6. Rituximab antibody titration with complement. Ramos cells were treated with increasing concentrations of RTX (0-20  $\mu\text{g/ml}$ ) for 30 min at 4°C. Next, cells were incubated with 50% normal human serum for 60 min at 37°C. Percentage of cell death was measured by propidium iodide inclusion and flow cytometry. RTX, rituximab.

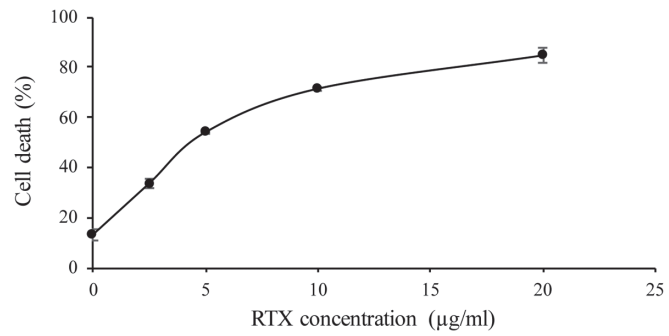

Figure S7. Rituximab antibody binding to peptide-treated cells. (A and B) Ramos cells were incubated with the indicated concentrations of (A) Mot-P2 or (B) Mot-P7 for 30 min at 37°C. Next, cells were labeled with RTX (2  $\mu$ g/ml; 30 min at 4°C), followed by Alexa-fluor 488-conjugated anti-human IgG antibodies. MFI of bound RTX was determined by flow cytometry and presented as MFI  $\pm$  standard deviation. n=3. RTX, rituximab; MFI, mean fluorescence intensity.

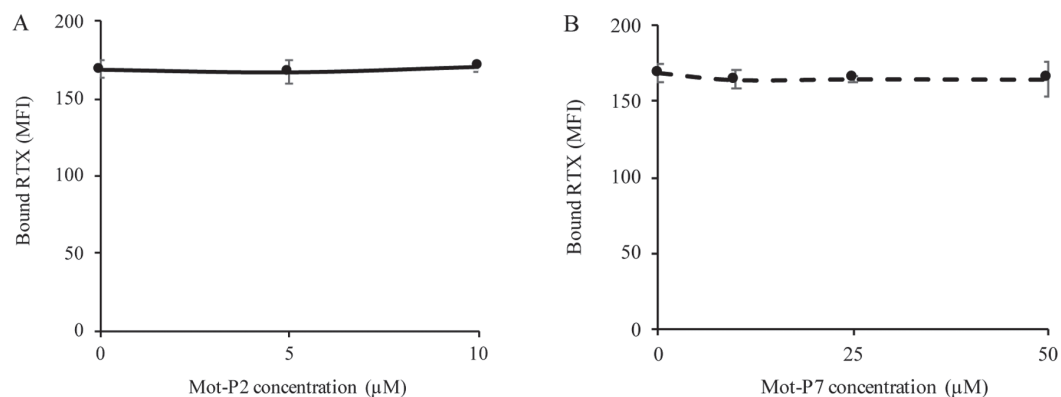

Table SI. Lethal dose 50 of mortalin mimetic peptides on lymphoma cells.

| Peptide <sup>a</sup> | Ramos | Raji | Z-138 |
|----------------------|-------|------|-------|
| Mot-P2               | 26    | 28   | 30    |
| Mot-P7               | 63    | 40   | 61    |
| Mot-P8               | 547   | 1728 | 574   |
| Mot-P10              | 22    | 130  | 97    |
| Mot-P14              | 48    | 87   | 232   |
| Mot-P16              | 92    | 123  | 262   |

<sup>a</sup>TAT-linked mortalin peptides. Table presents the concentration of peptide (in  $\mu\text{M}$ ) causing 50% cell death. Cells were treated with peptides for 24 h at 37°C. Dose-dependence curves of cell death are presented in Fig. 1.
